# Supplementary material
Source: PubMed Central journal article supplement (PMC2867909)
Supplement: 1002816107_stxt01.pdf [file 1002816107_stxt01.pdf]

## Supplementary Appendix File

Comprehensive assessment of variation at the Transforming Growth Factor Beta Type I Receptor locus and colorectal cancer predisposition

Luis G Carvajal-Carmona<sup>1</sup>, Mike Churchman<sup>1</sup>, Carolina Bonilla<sup>2,3</sup>, Axel Walther<sup>1</sup>,  
Jeremie H. Lefèvre<sup>2,3</sup>, David Kerr<sup>3</sup>, Malcolm Dunlop<sup>4</sup>, Richard Houlston<sup>5</sup>, Walter  
Bodmer<sup>2,3</sup>, Ian Tomlinson<sup>1</sup>

<sup>1</sup>Molecular and Population Genetics Laboratory, Wellcome Trust Centre for Human Genetics,  
University of Oxford, Oxford OX3 7BN, United Kingdom

<sup>2</sup>Cancer and Immunogenetics Laboratory, Weatherall Institute of Molecular Medicine, University of  
Oxford, Oxford OX3 9DZ, United Kingdom

<sup>3</sup>Department of Clinical Pharmacology, University of Oxford, OX3 7DQ, United Kingdom

<sup>4</sup>Colon Cancer Genetics Group, Medical Research Council, Human Genetics Unit, Western General  
Hospital, Edinburgh EH4 2XU, United Kingdom

<sup>5</sup>Section of Cancer Genetics, Institute of Cancer Research, Sutton SM2 5NG, United Kingdom

Correspondence to: Luis G Carvajal-Carmona, Molecular and Population Genetics Laboratory,  
Wellcome Trust Centre for Human Genetics, University of Oxford, Oxford OX3 7BN, United  
Kingdom. Tel: +44 (0) 1865 287500. Fax: +44 (0) 1865 287501. Email: [luis@well.ox.ac.uk](mailto:luis@well.ox.ac.uk)

Classification: Biomedical Sciences, Genetics

Supplementary Table 1. Association between CRC risk and *TGFBRI*(chr9:100,907,233-100,956,294) haplotypes defined by tagging SNPs. Haplotype blocks were assigned by the solid spine method as implemented in Haploview and a block chr9:100,897,000-100,973,999 contained *TGFBRI*. These eight haplotypes are defined by alleles at the tagging SNPs rs7034462, rs10819634, rs12686783, rs10988705, rs10739778, rs20226881, rs1571590, rs10512263 and rs7850895. Haplotypes 3 (TCTGCGATC) and 7 (CCCGCTGTT), shown in bold, contain the 6A allele at rs11466445. The VQ58 samples were typed with the Illumina Hap300 array. This array does not contain the SNPs rs10988705, rs10739778, rs20226881 and rs1571590. Therefore, haplotypes 1, 5 and 6 could not be distinguished from each other in the study, and the frequencies presented for haplotype 1 represent a pool of these three haplotypes. We also defined the haplotypes using two additional methods (confidence intervals and four-gamete rule) incorporated into Haploview and failed to detect any significant association between haplotypes in this region and CRC risk.

| Haplotype        | Corgi     |       |         | Scotland  |       |         | VQ58 <sup>3</sup> |       |         |
|------------------|-----------|-------|---------|-----------|-------|---------|-------------------|-------|---------|
|                  | Frequency |       | P-value | Frequency |       | P-value | Frequency         |       | P-value |
| Cases            | Controls  | Cases |         | Controls  | Cases |         | Controls          |       |         |
| CCCGAGATT        | 0.523     | 0.537 | 0.391   | 0.523     | 0.527 | 0.816   | 0.617             | 0.608 | 0.502   |
| CTCGCTGTT        | 0.188     | 0.173 | 0.212   | 0.191     | 0.183 | 0.541   | 0.188             | 0.183 | 0.658   |
| <b>TCTGCGATC</b> | 0.081     | 0.085 | 0.613   | 0.090     | 0.080 | 0.277   | 0.095             | 0.088 | 0.422   |
| CCCGAGACT        | 0.084     | 0.072 | 0.167   | 0.066     | 0.074 | 0.325   | 0.070             | 0.075 | 0.553   |
| CCCGCGATT        | 0.045     | 0.058 | 0.074   | 0.057     | 0.059 | 0.771   |                   |       |         |
| CCCAAGATT        | 0.043     | 0.048 | 0.524   | 0.045     | 0.045 | 0.971   |                   |       |         |
| <b>CCCGCTGTT</b> | 0.017     | 0.012 | 0.221   | 0.016     | 0.018 | 0.595   | 0.018             | 0.020 | 0.497   |
| TCTGCTATT        | 0.014     | 0.011 | 0.368   | 0.010     | 0.011 | 0.694   | 0.009             | 0.014 | 0.075   |

Supplementary Table 2. Tests of gene-gene interaction at SNPs in the TGF-beta pathway. Genotype frequencies at rs11466445 and rs4779584 (A), rs961253 (B), rs4444235 (C) and rs4939827 (D), where 0= common homozygote, 1=heterozygote, 2=rare homozygote. Data from the 3 case series have been pooled for this analysis. Analysis of each sample series individually also produced no evidence of gene-gene interactions.

| A)         |      | rs4779584 |     |                 | Total          |
|------------|------|-----------|-----|-----------------|----------------|
| rs11466445 | 0    | 1         | 2   |                 |                |
| 0          | 1453 | 788       | 142 |                 | 2383           |
| 1          | 318  | 167       | 13  |                 | 498            |
| 2          | 85   | 44        | 9   |                 | 138            |
| Total      | 1856 | 999       | 164 | $\chi^2_4=9.46$ | 3019<br>P=0.05 |

  

| B)         |     | rs961253 |     |                 | Total          |
|------------|-----|----------|-----|-----------------|----------------|
| rs11466445 | 2   | 1        | 0   |                 |                |
| 0          | 557 | 1119     | 707 |                 | 2383           |
| 1          | 112 | 219      | 167 |                 | 498            |
| 2          | 35  | 64       | 39  |                 | 138            |
| Total      | 704 | 1402     | 913 | $\chi^2_4=3.41$ | 3019<br>P=0.49 |

  

| C)         |     | rs4444235 |     |                 | Total          |
|------------|-----|-----------|-----|-----------------|----------------|
| rs11466445 | 2   | 1         | 0   |                 |                |
| 0          | 575 | 1193      | 613 |                 | 2381           |
| 1          | 108 | 246       | 144 |                 | 498            |
| 2          | 37  | 63        | 37  |                 | 137            |
| Total      | 720 | 1502      | 794 | $\chi^2_4=3.70$ | 3016<br>P=0.45 |

  

| D)         |     | rs4939827 |     |                 | Total          |
|------------|-----|-----------|-----|-----------------|----------------|
| rs11466445 | 2   | 1         | 0   |                 |                |
| 0          | 439 | 1182      | 761 |                 | 2382           |
| 1          | 90  | 231       | 176 |                 | 497            |
| 2          | 29  | 65        | 44  |                 | 138            |
| Total      | 558 | 1478      | 981 | $\chi^2_4=2.99$ | 3017<br>P=0.56 |

Supplementary Table 3. *TGFBR1* primers used for rare variant screening.

| <b>Exon</b> | <b>Primer name</b> | <b>Primer sequence (5'-3')</b> |
|-------------|--------------------|--------------------------------|
| 1           | TGFBR1-1F          | CTCCGAGCAGTTACAAAGGG           |
|             | TGFBR1-1R          | AAAGAGCAGGAGCGAGCC             |
| 2           | TGFBR1-2F          | AGAAATTGTGTGATAATAGGATCAAG     |
|             | TGFBR1-2R          | CTTGCCTCTAAACGGAATGAG          |
| 3           | TGFBR1-3F          | GGGTCACTCATTAGTGCCTATC         |
|             | TGFBR1-3R          | ACATTAAGAGATTTTAGGAATGCTATC    |
| 4           | TGFBR1-4F          | GCAGTGTGTGACTCAGGATTG          |
|             | TGFBR1-4R          | TATAGGCATGAGCCACCAGG           |
| 5           | TGFBR1-5F          | TTTGGGTTGGGAGAAGAGAC           |
|             | TGFBR1-5R          | TTTAAGCTGAGTTTCAGCAATG         |
| 6           | TGFBR1-6F          | CCAAATATGGCAGTAAGGGG           |
|             | TGFBR1-6R          | TCGGTGACATCCTGTTTCAG           |
| 7           | TGFBR1-7F          | GGTGATCTTTTAATGCCTTGG          |
|             | TGFBR1-7R          | TCCATGGCCCTTTCAATG             |
| 8           | TGFBR1-8F          | TCCAGACCAATGGAAAATGG           |
|             | TGFBR1-8R          | ACACTGCTGCAAAAGGAAGC           |

Supplementary Table 4. Association between genotyped (in bold) and imputed SNPs at the *TGFBR1*-containing haplotype block and CRC risk. SNPs without the rs prefix have been recently identified by the 1000genome project and their code refers to the chromosomal (in the case, located on chromosome 9) and physical location (number after the “-“) of the SNP. More details about these SNPs can be found at [www.1000genomes.org](http://www.1000genomes.org)). SNPs with nominal significant p-values in each one of the studies are highlighted in bold and red.

Supplementary Table 4 is available at: <http://www.well.ox.ac.uk/~luis/>

Supplementary Table 5. Association between SNPs proximal (A) and distal to the *TGFBR1* haplotype block and CRC risk. SNPs without the rs prefix have been recently identified by the 1000genome project and their code refers to the chromosomal and physical location (number after the “-“) of the SNP. More details about these SNPs can be found at [www.1000genomes.org](http://www.1000genomes.org). The distal SNP rs410180 is highlighted in bold and red in part B of the table. NI refers to non-informative imputation. SNPS with overall p values <0.01 are highlighted in bold

Supplementary Table 4 is available at: <http://www.well.ox.ac.uk/~luis/>

Supplementary Table 6. Association between SNPs at and around *TGFB1* , *TGFB2*, *TGFB3* , *TGFBR2* and *TGFBR3* and CRC risk. SNPs without the rs prefix have been recently identified by the 1000genome project and their code refers to the chromosomal and physical location (number after the “-“) of the SNP. More details about these SNPs can be found at [www.1000genomes.org](http://www.1000genomes.org). No SNP at or around *TGFB2*, *TGFB3* or *TGFBR3* had overall p values <0.01. Only 20 SNPs at *TGFB1* (n=7) and *TGFBR2* (n=13) had overall p values <0.01. These latter SNPs are highlighted in bold

Supplementary Table 4 is available at: <http://www.well.ox.ac.uk/~luis/>
